# Supplementary material for: Increased branching independent of strigolactone in cytokinin oxidase 2-overexpressing tomato is mediated by reduced auxin transport
Source: PubMed Central journal article supplement (PMC10514996; doi:10.1186/s43897-022-00032-1), 2022-05-03
Supplement: 43897_2022_32_MOESM2_ESM.pdf [file 43897_2022_32_MOESM2_ESM.pdf]

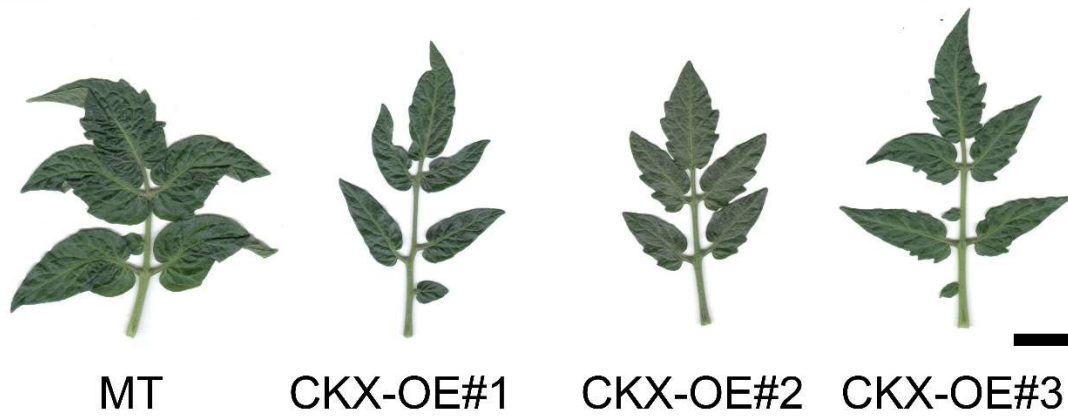

**Figure S1. Compound leaf development is altered in CKX2-overexpressing tomato plants.** Fully-expanded fifth leaf from each genotype at 45 DAE. Notice the smaller leaflets in the transgenic lines with smooth leaf margins.

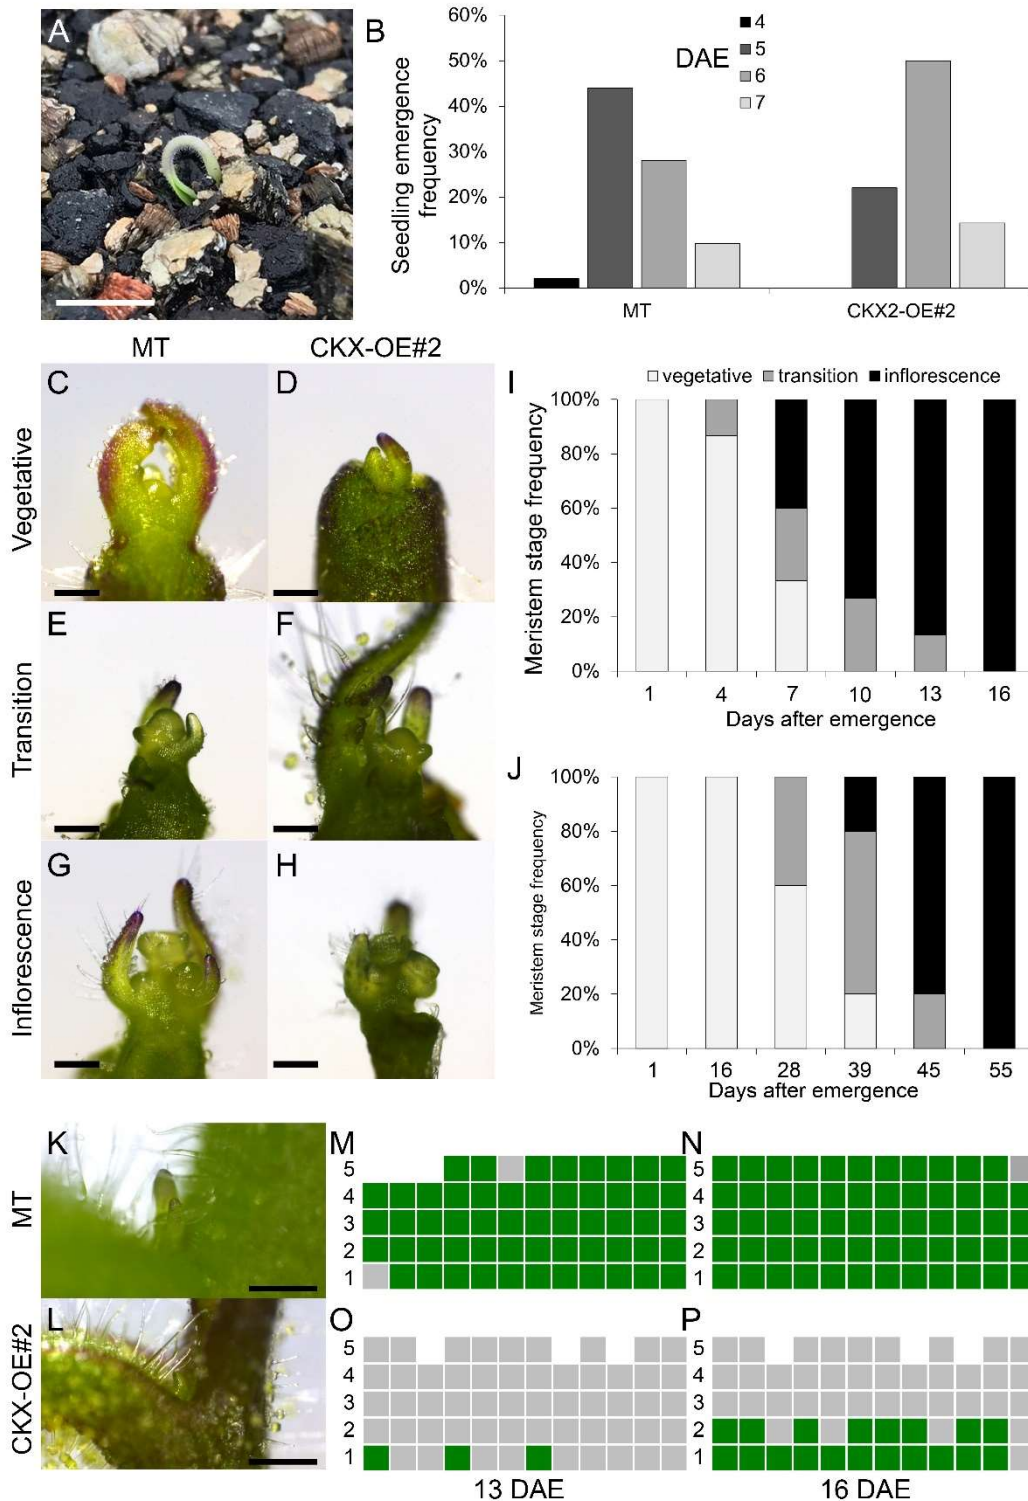

**Figure S2. Tomato CKX2-overexpressing plants delay initial development and the transition to reproductive development.** **A.** Seedlings considered as emerged from that stage; bar = 1cm. **B.** Seedling emergence frequency between 4 to 7 days after sowing (DAS). **C to H.** Representative images of meristem maturation of the primary shoot meristem of MT (**C**, **E** and

G) and CKX2-OE#2 (D, F and H) in the vegetative (C and D), transition (E and F) and reproductive (G and H) stages; bar = 200  $\mu$ m. **I and J.** Vegetative to reproductive primary meristem transition evaluated by the seedling frequency in each developmental stage in MT (I) and CKX2-OE#2 (J), from the 1st to 55th DAE (days after emergence). **K and L.** Representative bud axil initiation in the 2nd leaf axil of MT (K) and CKX2-OE#2 (L); bar = 400  $\mu$ m. **M to P.** Schematic representation of axillary bud formation in leaf axils at 13 and 16 DAE in MT (M and N) and in CKX2-OE#2 (O and P).

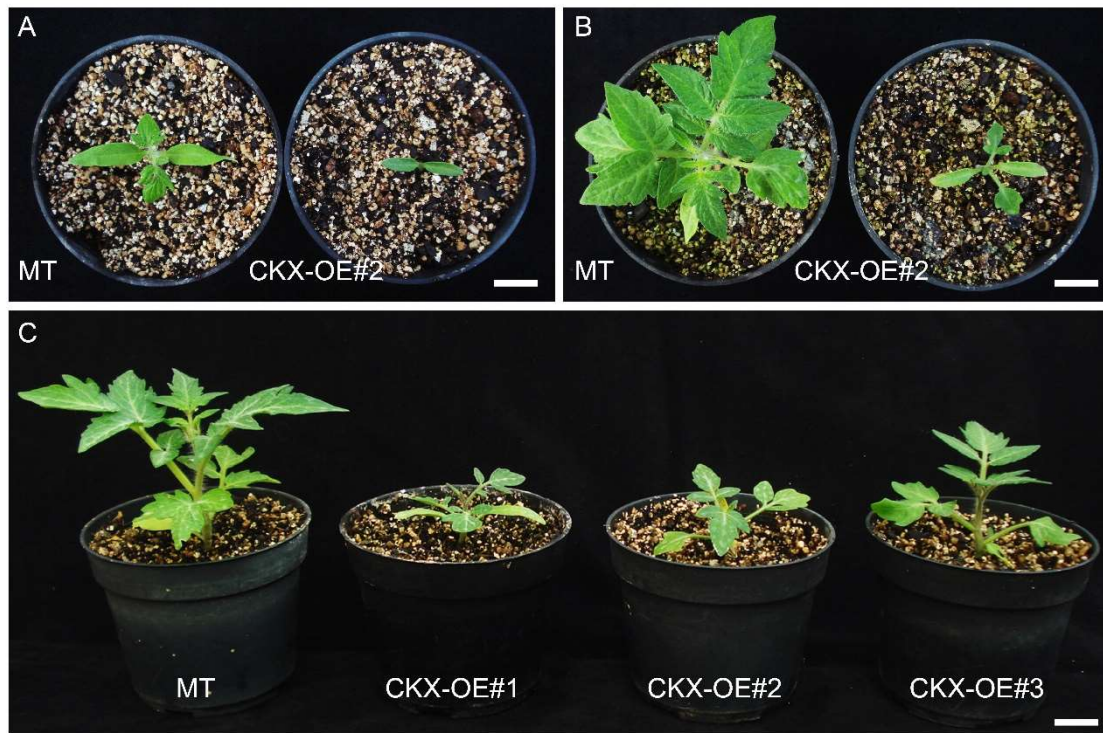

**Figure S3. Shoot phenotype of CKX2-overexpressing tomato plants.** The shoot development was registered in MT and CKX2-OE tomato plants at 14 DAE (A), 28 DAE (B) and 32 DAE (C). DAE, days after emergence.

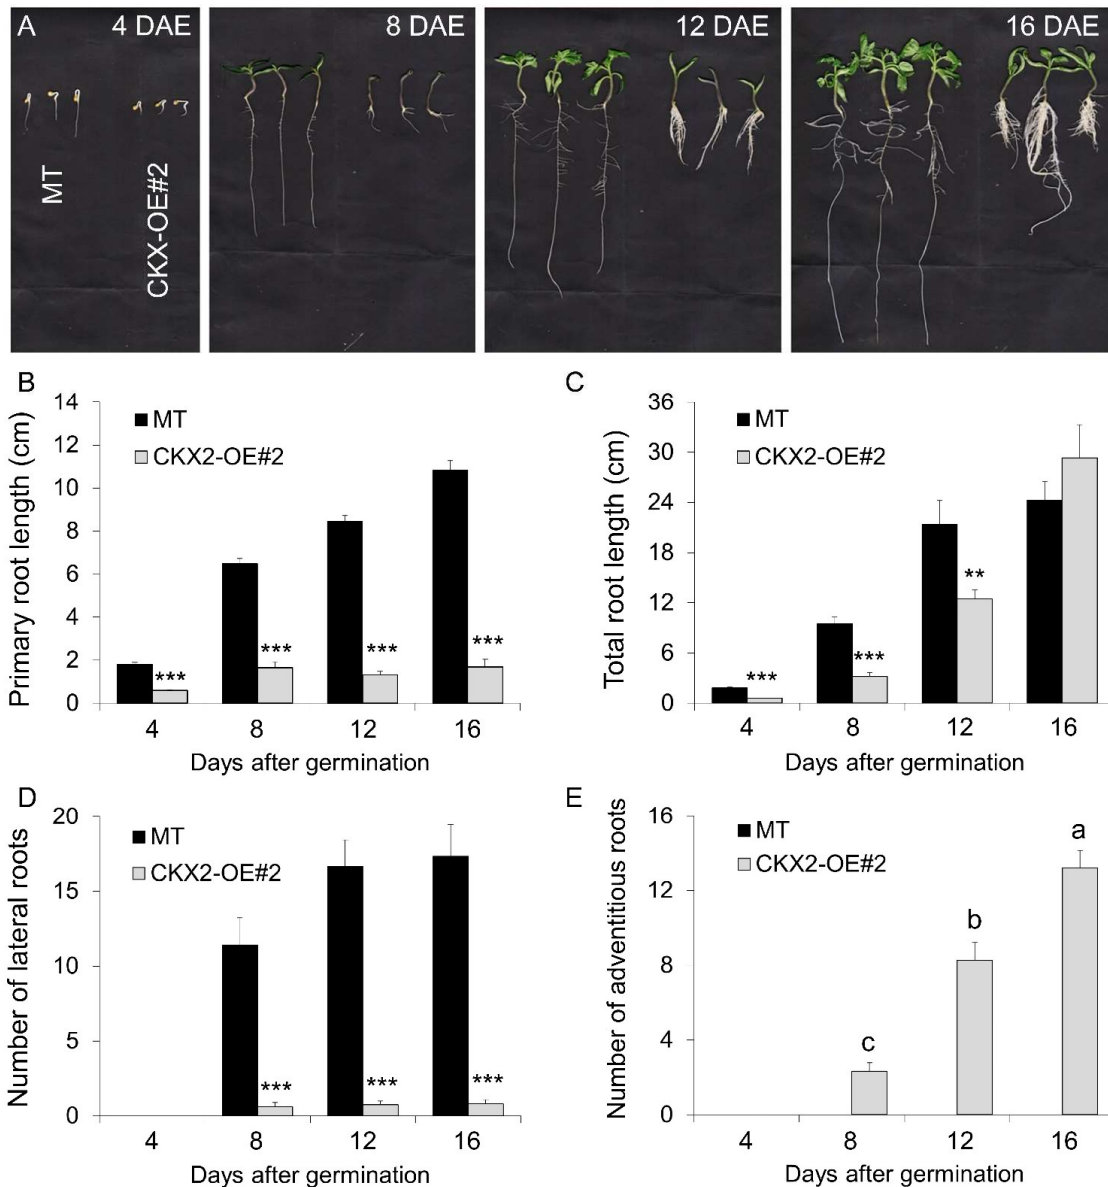

**Figure S4. Root development pattern is altered in tomato plants overexpressing *CKX2*.** **A.** Comparison of root growth of MT and CKX2-OE#2 seedlings at 4, 8, 12 and 16 days after emergence (DAE). **B.** Primary root length. **C.** Total root length. **D.** Number of lateral roots. **E.** Number of adventitious roots. Data are means  $\pm$  SE ( $n = 10$ ). B-D: asterisks indicate significant differences between genotypes within a treatment (B and C: Student's *t*-test; D: Mann Whitney test; \*\* $P < 0.01$ , \*\*\* $P < 0.001$ ; E: letters indicate significant differences among treatments within the same genotype (Tukey test;  $P < 0.05$ ).

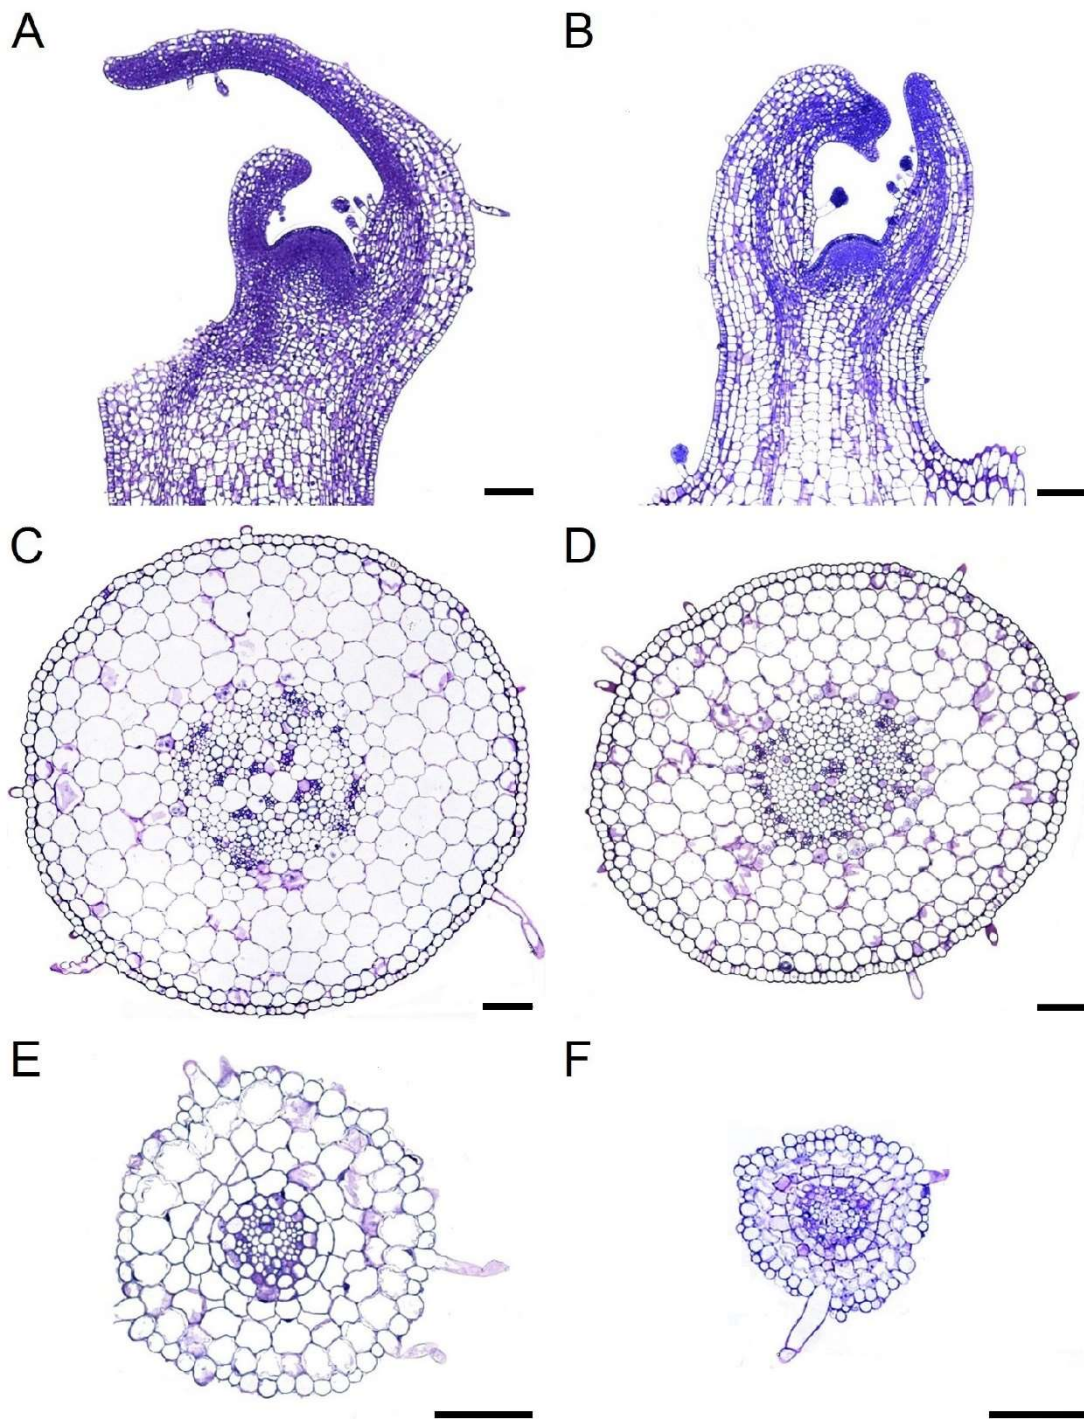

**Figure S5. Tomato CKX2-overexpressing plants alter SAM development, vessels organization and root development.** Apical shoot (A and B), hypocotyl (C and D) and primary root (E and F) were collected from MT (A, C and E) and CKX2-OE#2 (B, D and F) seedlings at

7 DAE. Apical shoots were longitudinally sectioned while hypocotyls and roots were cross-sectioned. Bar = 100  $\mu$ m.

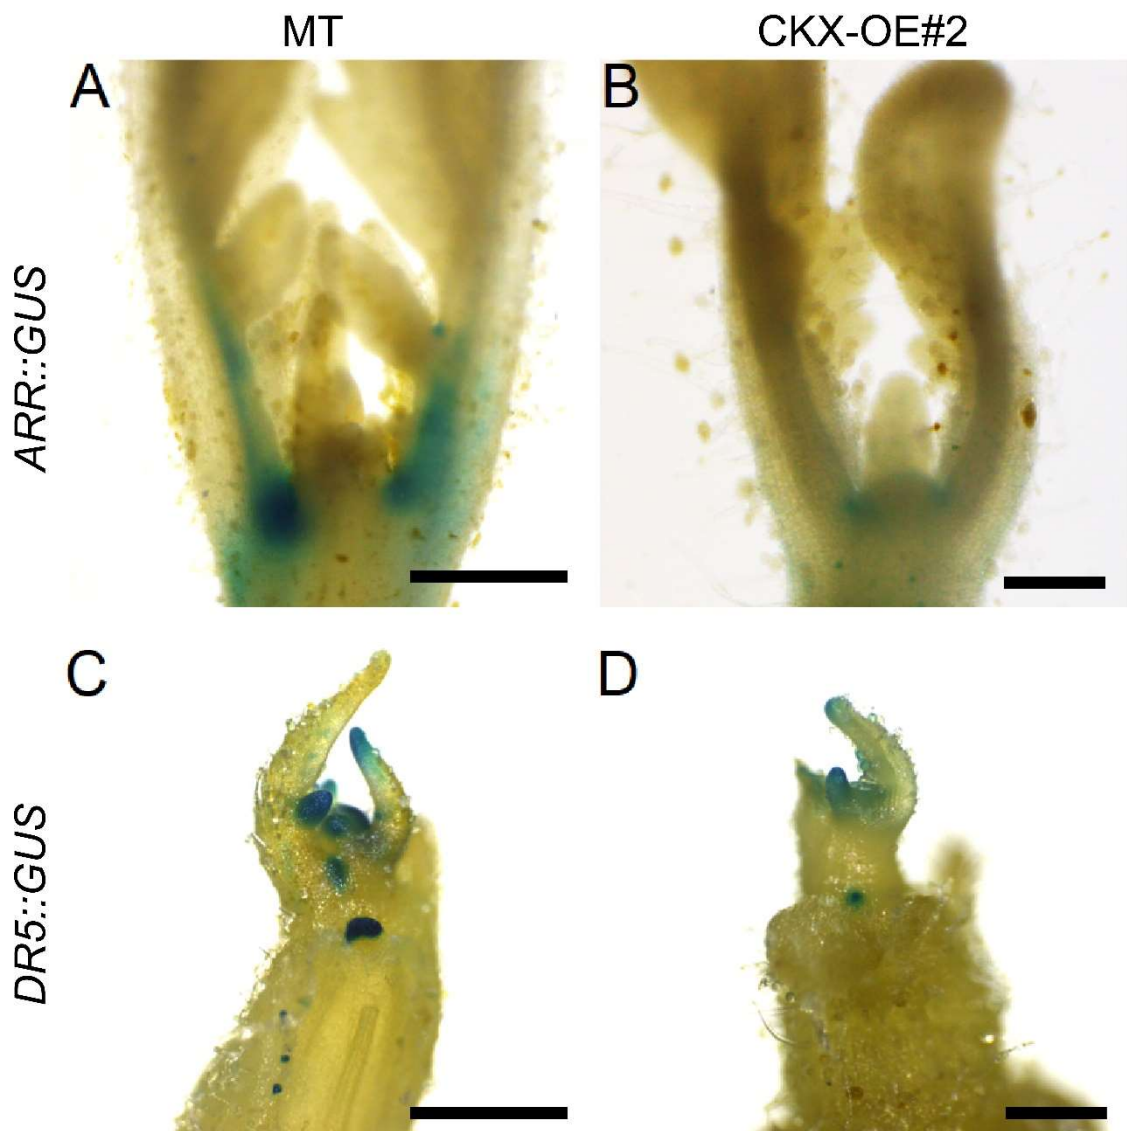

**Figure S6. Reduced *ARR5::GUS* and *DR5::GUS* expression in the CKX2-overexpressing tomato plants.** The *ARR5::GUS* (A and B) and *DR5::GUS* (C and D) expression was evaluated in apical shoots of MT (A and C) and CKX2-OE#2 (B and D) seedlings. Bars = 500  $\mu$ m (A, C and D) and 200  $\mu$ m (B).

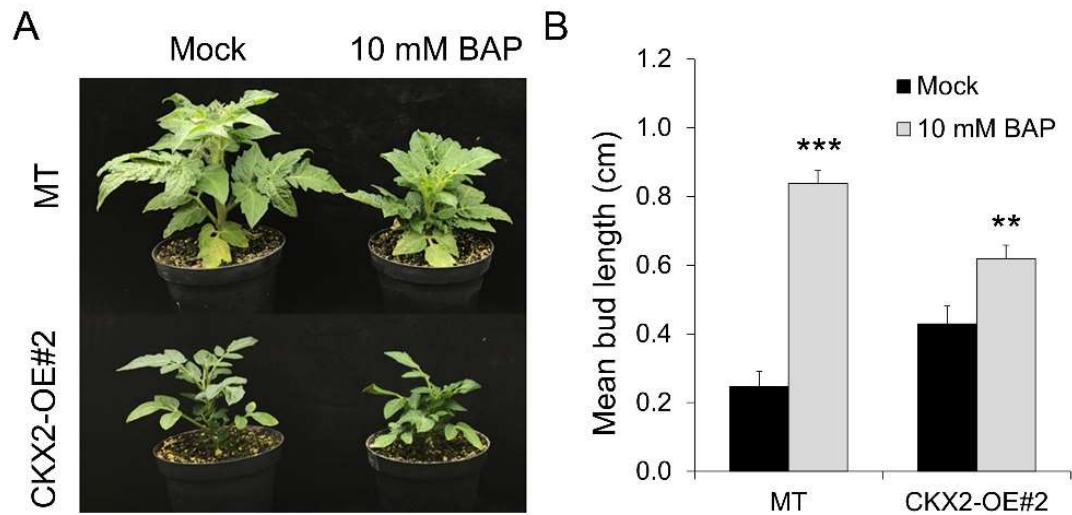

**Figure S7. Bud length of tomato plants overexpressing *CKX2* upon application of BAP.** Shoot phenotype (A) and mean bud length (B) of BAP-treated and non-treated CKX2-OE#2 compared to MT plants. BAP (10 mM) or mock (0 mM BAP) was applied in the leaf axil of MT and CKX2-OE#2 plants at the early vegetative (i.e., 20 DAE for MT and 38 DAE for CKX2-OE#2). The length of the bud in each axil were measured 13 days after treatment. Data are means  $\pm$  SE (n =12). Asterisks indicate significant differences between treatments within the same genotype (Mann Whitney test; \*\*P < 0.01, \*\*\*P < 0.001).

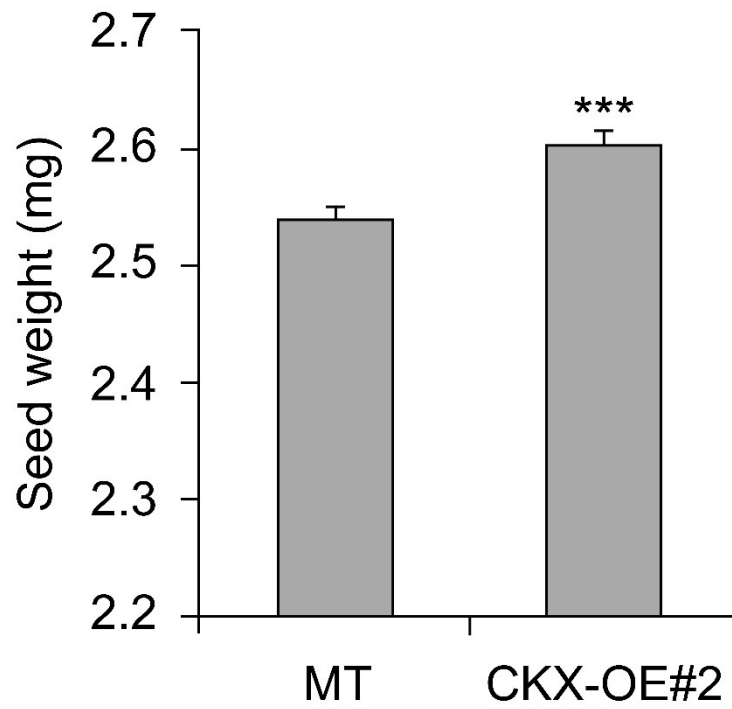

**Figure S8. Increased seed weight of CKX2-overexpressing tomato plants.** The weight of one seed was calculated from the weight of pools of 100 seeds. Data are means  $\pm$  SE (n=12). Asterisk indicate significant difference between genotypes (Student's t-test; \*\*\*P < 0.001).
